# Supplementary material for: A New Large †Pachycormiform (Teleosteomorpha: †Pachycormiformes) from the Lower Jurassic of Germany, with Affinities to the Suspension-Feeding Clade, and Comments on the Gastrointestinal Anatomy of Pachycormid Fishes
Source: MDPI journal article supplement (doi:10.3390/d14121026), 2022-11-24
Supplement: s1 [file s1]

Archive with 1 entries (1 files):
- diversity-2045308-supplementary.pdf
